# Supplementary material
Source: PubMed Central journal article supplement (PMC6290101)
Supplement: ba023531-suppl1.pdf [file ba023531-suppl1.pdf]

**Title:** *PHF6* and *DNMT3A* Mutations are Enriched in Distinct Subgroups of Mixed Phenotype Acute Leukemia with T-lineage Differentiation

Wenbin Xiao<sup>1</sup>, Maheetha Bharadwaj<sup>2</sup>, Max Levine<sup>2</sup>, Noushin Farnhoud<sup>2</sup>, Friederike Pastore<sup>3</sup>, Bartlomiej M Getta<sup>4</sup>, Anne Hultquist<sup>3</sup>, Christopher Famulare<sup>2</sup>, Juan S. Medina<sup>2</sup>, Minal A. Patel<sup>2</sup>, Qi Gao<sup>1</sup>, Natasha Lewis<sup>1</sup>, Janine Pichardo<sup>1</sup>, Jeeyeon Baik<sup>1</sup>, Brian Shaffer<sup>4</sup>, Sergio Giralt<sup>4</sup>, Raajit Rampal<sup>5</sup>, Sean Devlin<sup>6</sup>, Robert Cimera<sup>7</sup>, Yanming Zhang<sup>7</sup>, Maria Arcila<sup>8</sup>, Elli Papaemmanuil<sup>2,6</sup>, Ross L. Levine<sup>2,3,5</sup>, Mikhail Roshal<sup>1</sup>

Supplemental materials

Supplemental methods

Spreadsheet of mutations with annotations in MPAL (excel)

Figure S1 Updated MPAL classification based on genetic aberrations

Figure S2 Representative microarray results

Figure S3 Differential gene expression of sorted populations

Table S1 Workflow of sequencing studies performed on MPAL cases

Table S2 Antibody panels of immunophenotyping by flow cytometry

Table S3 Immunophenotypic results of MPAL by flow cytometry

Table S4 Gene list of RainDance panel

Table S5 Gene list of FoundationOne Heme panel

Table S6 Gene list of MSK IMPACT panel

Table S7 Gene list of Archer panel

## **Supplemental Methods**

### **Sequencing Data Generation on sorted blasts**

Three tumor samples from patients with Mixed Phenotype Acute Leukemia (MPAL) were sequenced using the Hemepact clinical assay. Short insert paired-end reads were aligned to the GRCh37 reference human genome with 1000 genomes decoy contigs using BWA-mem<sup>1</sup>. After alignment, we obtained an average of 500X coverage per sample.

### **Somatic Mutation Calling on sorted blasts**

#### **Substitutions**

Single base substitutions were called using CaVEMan (<http://cancerit.github.io/CaVEMan/>). As described previously<sup>2</sup>, the algorithm compares sequence data from each tumour sample albeit with an unmatched non-cancerous sample and calculates a mutation probability at each genomic locus. To improve specificity, a number of post-processing filters were applied as follows:

1. At least a third of the alleles containing the mutant must have base quality  $\geq 25$ .
2. If mutant allele coverage  $\geq 10X$ , there must be a mutant allele of at least base quality 20 in the middle 3rd of a read. If mutant allele coverage is  $< 10X$ , a mutant allele of at least base quality 20 in the first 2/3 of a read is acceptable.
3. The mutation position is marked by  $< 3$  reads in any sample in the unmatched normal panel.
4. The mutant allele proportion must be  $> 5$  times than that in the unmatched normal sample (or it is zero in the unmatched normal).
5. If the mean base quality is  $< 20$  then less than 96% of mutations carrying reads are in one direction.
6. Mutations within simple repeats, centromeric repeats, regions of excessive depth (<https://genome.ucsc.edu/>) and low mapping quality were excluded.

Additional unmatched normal filtering was performed using a set of unmatched normal samples. Mutations that were detected in  $> 5\%$  of the unmatched normal normal panel at  $\geq 5\%$  mutant allele burden were excluded.

Variant annotation was done in Ensembl v74 using VAGrENT<sup>3</sup>.

#### **Small insertions and deletions: Pindel**

Small somatic insertions and deletions (indels) were identified using a modified version of Pindel (<https://github.com/cancerit/cgpPindel>)<sup>4</sup>. To improve specificity, a number of post-processing filters were applied that required the following:

- 1) For regions with sequencing depth  $< 200X$ , mutant variant must be present in at least 8% of total reads.
- 2) For regions with sequencing depth  $\geq 200X$ , mutant variant must be present in at least 4% of total reads.
- 3) The region with the variant should have  $\leq 9$  small ( $< 4$  nucleotides) repeats.
- 4) The variant is not seen in any reads in the unmatched normal sample or the unmatched normal panel.
- 5) The number of Pindel calls in the tumor sample is greater than 4 and either:
  - a. The number of mutant reads mapped by BWA in the tumor sample is greater than 0 or

b. The number of mutant reads mapped by BWA in the tumor sample is equal to 0 but there are no repeats in the variant region and there are reads mapped by Pindel in the tumor sample on both the positive and negative strand.  
6) Pindel 'SUM-MS' score (sum of the mapping scores of the reads used as anchors)  $\geq 150$   
Additional unmatched normal filtering was performed using a set of unmatched normal samples (n=221). Mutations that were detected in  $>1\%$  of the unmatched normal normal panel at  $\geq 1\%$  mutant allele burden were excluded.

#### **Variant annotation was done in Ensembl v74 using VAGrENT<sup>3</sup>.**

For both substitutions and indels, variants that may have failed post processing filtering criteria but mapped to recurrent oncogenic mutations in COSMIC were retained for manual curation.

#### **Secondary pipelines for substitution and indel discovery and post call filters:**

To identify subclonal variants at very low frequencies in the tumor samples mutation calling using secondary pipelines were done. Strelka 2 (v2.8.3) [<https://doi.org/10.1101/192872>] was used to call point mutations and indels using tumor sample and matched normal. All "PASS" calls were examined for their presence in Caveman and Pindel outputs; all other filters from Strelka 2 were ignored. Calls uniquely identified by Strelka2 were retained for downstream analysis.

#### **The following filters were applied on calls identified by primary and secondary pipelines:**

Filter calls with  $> 3\%$  MAF in Exac (Version 0.3) or 1000 Genomes

Filter calls with  $> 0.5\%$  MAF in Exac or 1000 Genomes unless present in COSMIC (v81) [PMC2705836]

Filter synonymous and intronic (functionally inconsequential) variant

#### **Expression Analysis**

The RNA-Seq data set was mapped in the human transcriptome (hg19) using the quasi-mapping approach Salmon (v. 0.10.0) software<sup>5</sup>. The conversion from salmon estimated the relative abundance of this transcript (TPM) to gene level counts was performed using the R package tximport (v. 1.6.0)<sup>6</sup>.

To analyse the relationships and differences of expression data across samples, a hierarchical clustering was applied using 98 genes that have been previously shown to be associated with T-cell, B-cell or Myeloid signatures<sup>7</sup> using ComplexHeatmap package of R/Bioconductor, v.1.19.1<sup>8</sup>.

## References

1. Li H, Durbin R. Fast and accurate long-read alignment with Burrows-Wheeler transform. *Bioinformatics*. 2010;26(5):589-595.
2. Nik-Zainal S, Van Loo P, Wedge DC, et al. The life history of 21 breast cancers. *Cell*. 2012;149(5):994-1007.
3. Menzies A, Teague JW, Butler AP, et al. VAGrENT: Variation Annotation Generator. *Curr Protoc Bioinformatics*. 2015;52:15.18.11-11.
4. Raine KM, Hinton J, Butler AP, et al. cgpPindel: Identifying Somatically Acquired Insertion and Deletion Events from Paired End Sequencing. *Curr Protoc Bioinformatics*. 2015;52:15.17.11-12.
5. Patro R, Duggal G, Love MI, Irizarry RA, Kingsford C. Salmon provides fast and bias-aware quantification of transcript expression. *Nat Methods*. 2017;14(4):417-419.
6. Soneson C, Love M, Robinson M. Differential analyses for RNA-seq: transcript-level estimates improve gene-level inferences [version 1; referees: 2 approved]. *F1000Research*. 2015;4(1521).
7. Abbas AR, Baldwin D, Ma Y, et al. Immune response in silico (IRIS): immune-specific genes identified from a compendium of microarray expression data. *Genes Immun*. 2005;6(4):319-331.
8. Gu Z, Eils R, Schlesner M. Complex heatmaps reveal patterns and correlations in multidimensional genomic data. *Bioinformatics*. 2016;32(18):2847-2849.

1.

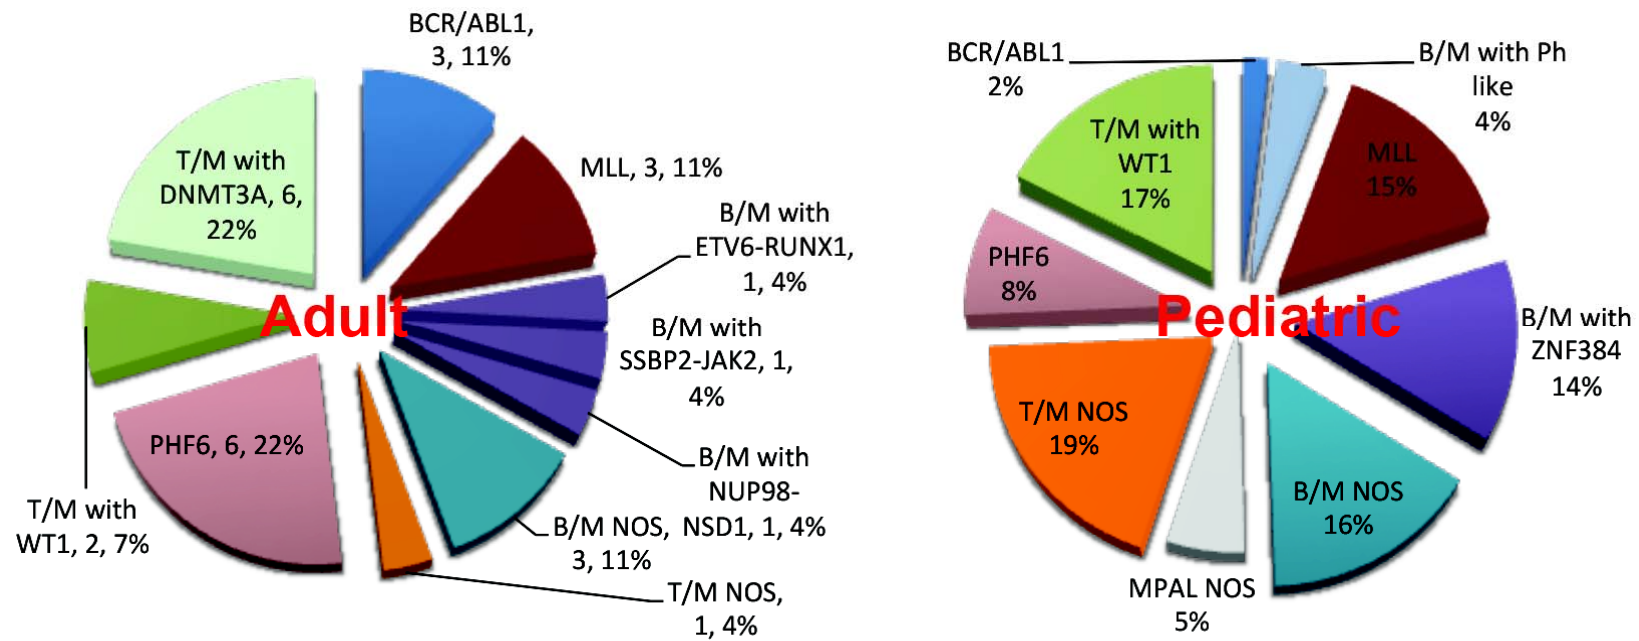

Figure S1 Updated MPAL classification based on genetic aberrations. Differences and similarities of genetic basis are observed between adult (our study) and pediatric MPAL (Alexander et al. Nature 2018). Although many genetic aberrations are shared between adult and pediatric MPAL, DNMT3A mutations are prevalent in adult MPAL but absent in pediatric ones. On the other hand, ZNF384 rearrangements are common in pediatric MPAL but absent in adult ones.

A.

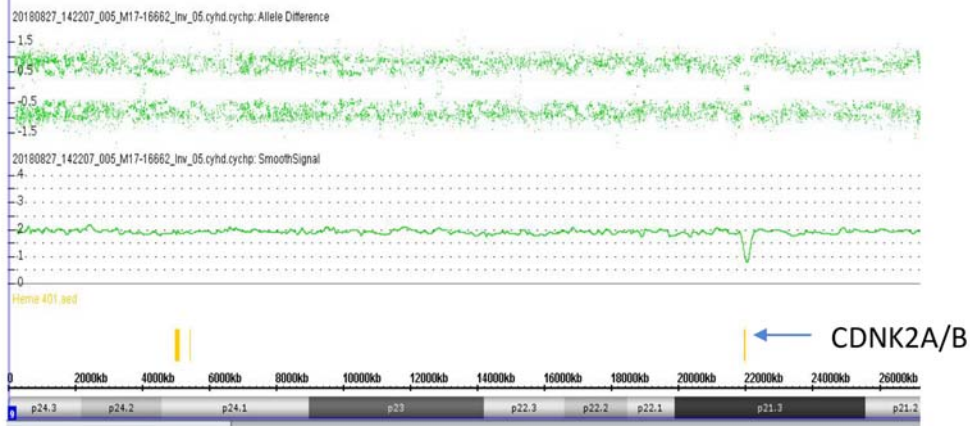

B.

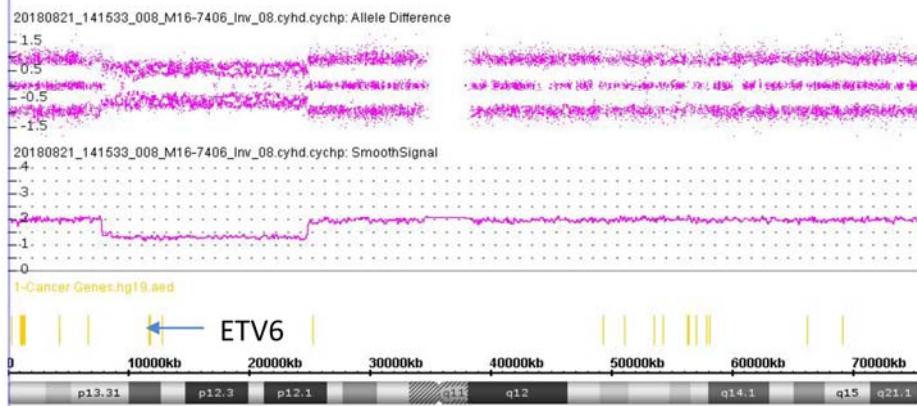

Figure S2 Representative microarray results. Microarray tests detected A). CN-LOH of 9p and a focal deletion of CDKN2A/B ( 9p21.3, arrow) in case 3, and B). An interstitial deletion of 12p involving the ETV6 gene (12p13.2, arrow) in case 16.

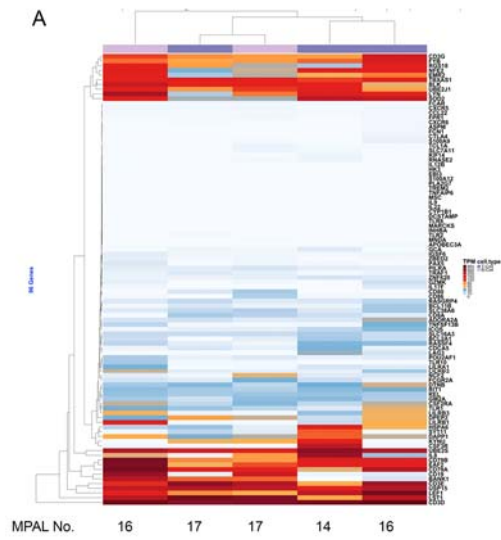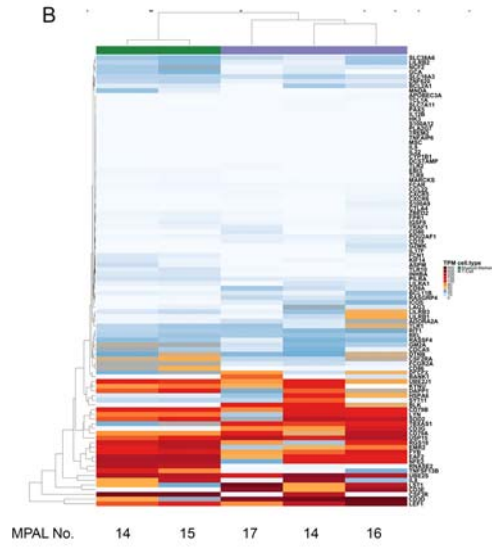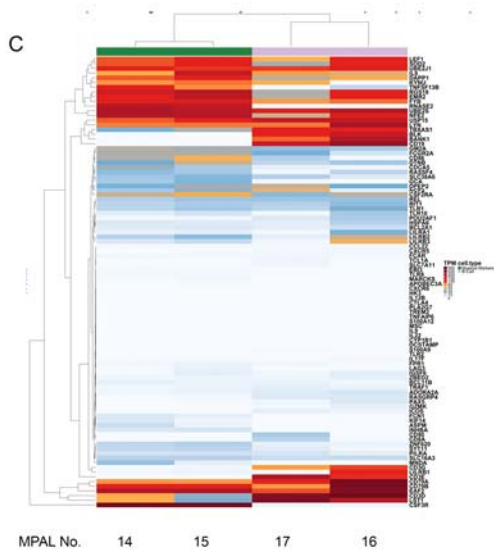

**Figure S3 Differential gene expression in sorted population. A, T-blasts vs B-blasts; B, Myeloid blasts vs T-blasts; C, Myeloid blasts vs B-blasts.**



**Table S1 Workflow of the sequencing studies performed on MPAL cases**

| Case | WHO.category                        | T-lineage<br>(0= No,<br>1=Yes) | Molecular | Fusion genes              | Archer or<br>RAN-seq<br>(1=done) | RainDance<br>(1=done) | Foundation<br>(1=done) | SNP-Array<br>(1=done) |
|------|-------------------------------------|--------------------------------|-----------|---------------------------|----------------------------------|-----------------------|------------------------|-----------------------|
| 1    | MPAL with<br>t(v;11q23)             | 0                              | others    | <i>MLL-AF4</i>            | 1                                | 1                     | ND                     | ND                    |
| 2    | MPAL with<br>t(v;11q23)             | 0                              | others    | <i>MLL-AF4</i>            | 1                                | 1                     | 1                      | ND                    |
| 3    | MPAL with<br>t(v;11q23)             | 0                              | others    | <i>MLL-AF4</i>            | 1                                | 1                     | 1                      | 1                     |
| 4    | MPAL with<br>t(9;22)(q34;q<br>11.2) | 0                              | others    | <i>BCR-ABL1</i>           | 1                                | 1                     | 1                      | ND                    |
| 5    | MPAL with<br>t(9;22)(q34;q<br>11.2) | 0                              | others    | <i>BCR-ABL1</i>           | 1                                | 1                     | ND                     | 1                     |
| 6    | MPAL with<br>t(9;22)(q34;q<br>11.2) | 0                              | others    | <i>BCR-ABL1</i>           | 1                                | 1                     | ND                     | 1                     |
| 7    | MPAL<br>B/Myeloid,<br>NOS           | 0                              | others    | Negative                  | 1*                               | 1                     | ND                     | 1                     |
| 8    | MPAL<br>B/Myeloid,<br>NOS           | 0                              | others    | <i>NUP98-NSD1</i>         | 1*                               | 1                     | ND                     | 1                     |
| 9    | MPAL<br>B/Myeloid,<br>NOS           | 0                              | others    | <i>ETV6-RUNX1</i>         | 1*                               | 1                     | 1                      | ND                    |
| 10   | MPAL<br>B/Myeloid,<br>NOS           | 0                              | others    | <i>SSBP2-JAK2</i>         | 1*                               | 1                     | 1                      | ND                    |
| 11   | MPAL<br>B/Myeloid,<br>NOS           | 0                              | others    | Negative                  | 1*                               | 1                     | 1                      | 1                     |
| 12   | MPAL<br>B/Myeloid,<br>NOS           | 0                              | PHF6      | Unknown                   | ND                               | 1                     | ND                     | ND                    |
| 13   | MAPL<br>T/Myeloid,<br>NOS           | 1                              | PHF6      | <i>PICALM-<br/>MLLT10</i> | 1*                               | 1                     | 1                      | ND                    |
| 14   | MAPL, NOS                           | 1                              | PHF6      | <i>SEM4B-<br/>BCL11A</i>  | 1*                               | 1                     | 1                      | ND                    |

|    |                           |   |        |                           |    |    |    |    |
|----|---------------------------|---|--------|---------------------------|----|----|----|----|
| 15 | MAPL<br>T/Myeloid,<br>NOS | 1 | PHF6   | Negative                  | 1* | 1  | ND | ND |
| 16 | MPAL, NOS                 | 1 | PHF6   | <i>SET-NUP214</i>         | 1* | 1  | 1  | 1  |
| 17 | MPAL, NOS                 | 1 | PHF6   | Negative                  | 1* | 1  | 1  | ND |
| 18 | MAPL<br>T/Myeloid,<br>NOS | 1 | DNMT3A | Unknown                   | ND | 1  | ND | 1  |
| 19 | MAPL<br>T/Myeloid,<br>NOS | 1 | DNMT3A | Negative                  | 1* | 1  | ND | 1  |
| 20 | MAPL<br>T/Myeloid,<br>NOS | 1 | DNMT3A | Negative                  | 1* | 1  | ND | 1  |
| 21 | MAPL<br>T/Myeloid,<br>NOS | 1 | DNMT3A | Negative                  | 1* | 1  | ND | 1  |
| 22 | MAPL<br>T/Myeloid,<br>NOS | 1 | DNMT3A | <i>PICALM-<br/>MLLT10</i> | 1* | 1  | 1  | 1  |
| 23 | MAPL<br>T/Myeloid,<br>NOS | 1 | DNMT3A | Unknown                   | ND | 1  | ND | ND |
| 24 | MAPL<br>T/Myeloid,<br>NOS | 1 | others | Negative                  | 1* | 1  | ND | ND |
| 25 | MAPL<br>T/Myeloid,<br>NOS | 1 | others | Negative                  | 1* | 1  | ND | 1  |
| 26 | MAPL<br>T/Myeloid,<br>NOS | 1 | others | Negative                  | 1* | 1  | ND | 1  |
| 27 | MAPL<br>T/Myeloid,<br>NOS | 1 | ND     | Unknown                   | ND | ND | ND | ND |
| 28 | MPAL with<br>t(v;11q23)   | 0 | ND     | Unknown                   | ND | ND | ND | ND |
| 29 | MPAL<br>B/Myeloid,<br>NOS | 0 | ND     | Unknown                   | ND | ND | ND | ND |

\* RNA-seq data. ND, not done.

**Table S2 Antibody panels of immunophenotyping by flow cytometry**

| Myeloid tube 1            | Myeloid tube 2              | Myeloid tube 3            | B-ALL            | T-ALL                   | Intracytoplasmics         |
|---------------------------|-----------------------------|---------------------------|------------------|-------------------------|---------------------------|
| CD15 FITC (BC)            | CD64 FITC (BC)              | CD7 BB515 (BD<br>HORIZON) | CD20 FITC (BD)   | cyCD3 Alexa-488<br>(BD) | MPO FITC (BC)             |
| CD33 PE (BC)              | CD123 PE (BD<br>PHARM)      | CD56 PE (BC)              | CD34 PE (BC)     | CD7 PE (BD)             | cyCD79a PE (BC)           |
| CD117 PC5 (BC)            | CD14 PC5 (BC)               | CD5 PerCP-Cy5.5<br>(BD)   | CD10 PC5.5 (BC)  | CD56 PC5 (BC)           | CD19 PC7 (BC)             |
| CD13 PE-Cy7 (BD)          | CD13 PE-Cy7 (BD)            | CD33 PC7 (BC)             | CD33 PC7 (BC)    | CD16 PC5 (BC)           | CD34 PerCP-Cy5.5<br>(BD)  |
| CD34 APC (BC)             | CD34 APC (BC)               | CD34 APC (BC)             | CD58 APC (BC)    | CD5 PC7 (BC)            | cyCD3 APC (BC)            |
| CD71 APC-A700<br>(BC)     | CD16 APC-A700<br>(BC)       | CD4 APC-A700 (BC)         | CD45 APC-H7 (BD) | CD3 APC (BD)            | CD45 APC-H7 (BD)          |
| CD38 APC-A750<br>(BC)     | CD38 APC-A750<br>(BC)       | CD38 APC-A750<br>(BC)     | CD19 BV421 (BD)  | CD10 APC-R700<br>(BD)   | CD3 BV421 (BD<br>HORIZON) |
| HLA-DR PAC BLUE<br>(BC)   | HLA-DR PAC BLUE<br>(BC)     | CD2 BV421 (BD<br>PHARM)   | CD38 BV510 (BD)  | CD38 APC-A750<br>(BC)   |                           |
| CD45 V500c (BD)           | CD45 V500C (BD)             | CD45 V500c (BD)           |                  | CD48 BV421 (BD)         |                           |
| CD19 BV605<br>(BIOLEGEND) | CD11b BV605 (BD<br>HORIZON) | CD25 BV605<br>(Biolegend) |                  | CD45 V500c (BD)         |                           |

**Table S3 Flow cytometric immunophenotype of MPAL**

| Case | MP<br>0 | CD3<br>3 | CD1<br>3 | CD1<br>5 | CD1<br>4 | CD6<br>4 | CD11<br>b | CD5<br>6 | CD12<br>3 | HLAD<br>R | Td<br>T* | CD<br>2 | cyC<br>D3 | CD<br>4 | CD<br>5 | CD<br>7 | CD<br>8 | CD1<br>9 | cyC<br>D7<br>9a | CD2<br>0 | CD2<br>2 | CD1<br>0 | CD3<br>4 | CD11<br>7 |
|------|---------|----------|----------|----------|----------|----------|-----------|----------|-----------|-----------|----------|---------|-----------|---------|---------|---------|---------|----------|-----------------|----------|----------|----------|----------|-----------|
| 1    | 0       | 1        | 0        | 0        | 0        | 1        | 1         | 0        | 1         | 0         | 1        | 0       | 0         | 0       | 0       | 0       | 0       | 1        | 1               | 0        | 0        | 0        | 1        | 0         |
| 2    | 0       | 1        | 1        | 1        | 0        | 1        | 1         | 0        | 1         | 1         | 1        | 0       | 0         | 0       | 0       | 0       | 0       | 1        | 1               | 0        | 0        | 0        | 1        | 0         |
| 3    | 1       | 1        | 1        | 1        | 0        | 1        | 1         | 0        | 1         | 1         | 1        | 0       | 0         | 0       | 0       | 0       | 0       | 1        | 1               | 0        | 0        | 0        | 1        | 0         |
| 4    | 1       | 1        | 1        | 1        | 0        | 0        | 1         | 0        | 1         | 1         | 1        | 0       | 0         | 0       | 0       | 0       | 0       | 1        | 1               | 0        | ND       | 1        | 1        | 0         |
| 5    | 1       | 1        | 1        | 0        | 0        | 0        | 0         | 1        | 1         | 1         | 1        | 0       | 0         | 0       | 0       | 0       | 0       | 1        | 1               | 0        | 0        | 0        | 1        | 0         |
| 6    | 1       | 1        | 1        | 1        | 0        | 0        | 0         | 0        | 1         | 1         | 1        | 0       | 0         | 0       | 0       | 0       | 0       | 1        | 1               | 0        | 0        | 0        | 1        | 0         |
| 7    | 0       | 1        | 1        | 0        | 0        | 0        | 0         | 0        | 1         | 1         | 1        | 0       | 0         | 0       | 0       | 1       | 0       | 1        | 1               | 1        | ND       | 0        | 1        | 1         |
| 8    | 1       | 1        | 1        | 1        | 0        | 0        | 0         | 0        | 1         | 1         | 1        | 0       | 0         | 0       | 0       | 0       | 0       | 1        | 1               | 0        | 0        | 0        | 1        | 1         |
| 9    | 1       | 1        | 1        | 1        | 0        | 0        | 0         | 0        | 1         | 1         | 1        | 0       | 0         | 0       | 0       | 0       | 0       | 1        | 1               | 0        | ND       | 1        | 1        | 1         |
| 10   | 0       | 1        | 1        | 0        | 0        | 0        | 0         | 0        | 1         | 1         | 1        | 0       | 0         | 0       | 0       | 0       | 0       | 1        | 1               | 0        | ND       | 1        | 1        | 1         |
| 11   | 1       | 1        | 1        | 1        | 0        | 1        | 0         | 0        | 1         | 1         | 1        | 1       | 0         | 0       | 0       | 0       | 0       | 1        | 1               | 0        | ND       | 1        | 1        | 0         |
| 12   | 1       | 1        | 1        | 0        | 0        | 0        | 0         | 0        | 1         | 1         | 1        | 0       | 0         | 0       | 0       | 0       | 0       | 1        | 1               | 1        | ND       | 1        | 1        | 0         |
| 13   | 1       | 1        | 0        | 1        | 0        | 1        | 1         | 1        | 1         | 0         | 1        | 0       | 1         | 0       | 1       | 1       | 0       | 0        | 1               | 0        | 0        | 0        | 1        | 0         |
| 14   | 1       | 1        | 0        | 0        | 0        | 0        | 0         | 1        | 1         | 1         | 1        | 1       | 1         | 0       | 1       | 1       | 0       | 1        | 1               | 1        | 1        | 1        | 1        | 1         |
| 15   | 1       | 1        | 1        | 0        | 0        | 1        | 1         | 1        | 1         | 1         | 1        | 1       | 1         | 1       | 1       | 0       | 0       | 1        | 0               | 0        | 0        | 0        | 0        | 1         |
| 16   | 0       | 1        | 0        | 0        | 0        | 0        | 1         | 0        | 1         | 1         | 1        | 1       | 1         | 0       | 1       | 1       | 0       | 1        | 1               | 0        | ND       | 0        | 0        | 0         |
| 17   | 1       | 1        | 1        | 1        | 1        | 1        | 1         | 0        | 1         | 1         | 1        | 1       | 1         | 0       | 1       | 1       | 0       | 1        | 1               | 1        | 1        | 1        | 0        | 1         |
| 18   | 0       | 1        | 1        | 0        | 1        | 1        | 1         | 0        | 1         | 1         | 1        | 1       | 1         | 0       | 0       | 1       | 0       | 0        | 0               | 0        | ND       | 0        | 1        | 1         |
| 19   | 1       | 1        | 1        | 0        | 0        | 0        | 1         | 0        | 1         | 1         | 1        | 0       | 1         | 0       | 1       | 1       | 0       | 0        | 0               | 0        | 0        | 0        | 1        | 0         |
| 20   | 1       | 1        | 1        | 1        | 0        | 0        | 1         | 1        | 1         | 1         | ND       | 1       | 1         | 0       | 1       | 1       | 0       | 0        | 0               | 0        | 0        | 0        | 1        | 0         |
| 21   | 1       | 1        | 1        | 1        | 0        | 0        | 1         | 1        | 1         | 1         | ND       | 1       | 1         | 0       | 1       | 1       | 0       | 0        | 0               | 0        | 0        | 0        | 1        | 0         |
| 22   | 1       | 1        | 1        | 1        | 0        | 0        | 0         | 0        | 1         | 1         | ND       | 0       | 1         | 0       | 1       | 1       | 0       | 0        | 1               | 0        | 0        | 1        | 1        | 1         |
| 23   | 1       | 1        | 1        | 0        | 0        | 0        | 0         | 1        | 1         | 1         | 1        | 0       | 1         | 1       | 1       | 1       | 0       | 0        | 0               | 0        | 0        | 0        | 1        | 1         |
| 24   | 1       | 0        | 1        | 1        | 0        | 0        | 1         | 1        | 1         | 1         | 1        | 1       | 1         | 0       | 0       | 1       | 0       | 0        | 0               | 0        | ND       | 0        | 1        | 1         |
| 25   | 1       | 1        | 1        | 0        | 0        | 0        | 0         | 0        | 1         | 1         | 1        | 1       | 1         | 0       | 0       | 1       | 0       | 0        | 0               | 0        | ND       | 0        | 1        | 1         |
| 26   | 1       | 0        | 1        | 0        | 0        | 0        | 0         | 0        | 1         | 1         | 1        | 1       | 1         | 0       | 0       | 1       | 0       | 0        | 0               | 0        | ND       | 0        | 1        | 1         |
| 27   | 1       | 1        | 0        | 0        | 0        | 0        | 0         | 1        | 1         | 1         | 1        | 0       | 1         | 0       | 0       | 1       | 0       | 0        | 0               | 0        | ND       | 0        | 1        | 0         |
| 28   | 1       | 1        | 1        | 0        | 0        | 1        | 1         | 0        | 1         | 1         | 1        | 0       | 0         | 0       | 1       | 1       | 0       | 1        | 1               | 0        | 1        | 0        | 1        | 1         |
| 29   | 1       | 1        | 1        | 0        | 0        | 0        | 0         | 0        | 1         | 1         | 1        | 0       | 0         | 0       | 0       | 0       | 0       | 1        | 1               | 0        | 1        | 1        | 1        | 1         |

\* Also included data from immunohistochemical stain. ND, not done.

**Table S4 Gene list of RainDance panel**

|        |      |       |       |
|--------|------|-------|-------|
| ASXL1  | IDH1 | MPL   | SH2B3 |
| CBL    | IDH2 | NPM1  | SUZ12 |
| CEBPA  | JAK1 | NRAS  | TET1  |
| DNMT3A | JAK2 | PHF6  | TET2  |
| ETV6   | JAK3 | PTEN  | TP53  |
| EZH2   | KIT  | RUNX1 | TYK2  |
| FLT3   | KRAS | SF3B1 | WT1   |

**Table S5 Gene list of FoundationOne Heme panel**

Gene list--Entire coding sequence (base substitutions, indels, copy number alterations)

|                 |             |              |              |             |            |             |              |               |
|-----------------|-------------|--------------|--------------|-------------|------------|-------------|--------------|---------------|
| <b>ABL1</b>     | <b>CBFB</b> | <b>DUSP9</b> | <b>FOXL2</b> | <b>IRF1</b> | <b>MPL</b> | <b>PIM1</b> | <b>SOX10</b> | <b>ZNF217</b> |
| <b>ACTB</b>     | CBL         | EBF1         | FOXO1        | IRF4        | MRE11A     | PLCG2       | SOX2         | ZNF24         |
| <b>AKT1</b>     | CCND1       | ECT2L        | FOXO3        | IRF8        | MSH2       | POT1        | SPEN         | ZNF703        |
| <b>AKT2</b>     | CCND2       | EED          | FOXP1        | IRS2        | MSH3       | PPP2R1A     | SPOP         | ZRSR2         |
| <b>AKT3</b>     | CCND3       | EGFR         | FRS2         | JAK1        | MSH6       | PRDM1       | SRC          |               |
| <b>ALK</b>      | CCNE1       | ELP2         | GADD45B      | JAK2        | MTOR       | PRKAR1A     | SRSF2        |               |
| <b>AMER1</b>    | CCT6B       | EP300        | GATA1        | JAK3        | MUTYH      | PRKDC       | STAG2        |               |
| <b>APC</b>      | CD22        | EPHA3        | GATA2        | JARID2      | MYC        | PRSS8       | STAT3        |               |
| <b>APH1A</b>    | CD274       | EPHA5        | GATA3        | JUN         | MYCL       | PTCH1       | STAT4        |               |
| <b>AR</b>       | CD36        | EPHA7        | GID4         | KAT6A       | MYCN       | PTEN        | STAT5A       |               |
| <b>ARAF</b>     | CD58        | EPHB1        | GNA11        | KDM2B       | MYD88      | PTPN11      | STAT5B       |               |
| <b>ARFRP1</b>   | CD70        | ERBB2        | GNA12        | KDM4C       | MYO18A     | PTPN2       | STAT6        |               |
| <b>ARHGAP26</b> | CD79A       | ERBB3        | GNA13        | KDM5A       | NCOR2      | PTPN6       | STK11        |               |
| <b>ARID1A</b>   | CD79B       | ERBB4        | GNAQ         | KDM5C       | NCSTN      | PTPRO       | SUFU         |               |
| <b>ARID2</b>    | CDC73       | ERG          | GNAS         | KDM6A       | NF1        | RAD21       | SUZ12        |               |
| <b>ASMTL</b>    | CDH1        | ESR1         | GPR124       | KDR         | NF2        | RAD50       | TAF1         |               |
| <b>ASXL1</b>    | CDK12       | ETS1         | GRIN2A       | KEAP1       | NFE2L2     | RAD51       | TBL1XR1      |               |
| <b>ATM</b>      | CDK4        | ETV6         | GSK3B        | KIT         | NFKBIA     | RAF1        | TCF3         |               |
| <b>ATR</b>      | CDK6        | EXOSC6       | G7SE1        | KLHL6       | NKX2-1     | RARA        | TCL1A        |               |
| <b>ATRX</b>     | CDK8        | EZH2         | HDAC1        | KMT2A       | NOD1       | RASGEF1A    | TET2         |               |
| <b>AURKA</b>    | CDKN1B      | FAF1         | HDAC4        | KMT2C       | NOTCH1     | RB1         | TGFBR2       |               |
| <b>AURKB</b>    | CDKN2A      | FAM46C       | HDAC7        | KMT2D       | NOTCH2     | RELN        | TLL2         |               |
| <b>AXIN1</b>    | CDKN2B      | FANCA        | HGF          | KRAS        | NPM1       | RET         | TMEM30A      |               |
| <b>AXL</b>      | CDKN2C      | FANCC        | HIST1H1C     | LEF1        | NRAS       | RHOA        | TMSB4XP8     |               |
| <b>B2M</b>      | CEBPA       | FANCD2       | HIST1H1D     | LRP1B       | NT5C2      | RICTOR      | TNFAIP3      |               |
| <b>BAP1</b>     | CHD2        | FANCE        | HIST1H1E     | LRRK2       | NTRK1      | RNF43       | TNFRSF11A    |               |
| <b>BARD1</b>    | CHEK1       | FANCF        | HIST1H2AC    | MAF         | NTRK2      | ROS1        | TNFRSF14     |               |
| <b>BCL10</b>    | CHEK2       | FANCG        | HIST1H2AG    | MAFB        | NTRK3      | RPTOR       | TNFRSF17     |               |
| <b>BCL11B</b>   | CIC         | FANCL        | HIST1H2AL    | MAGED1      | NUP93      | RUNX1       | TOP1         |               |
| <b>BCL2</b>     | CIITA       | FAS          | HIST1H2AM    | MALT1       | NUP98      | S1PR2       | TP53         |               |
| <b>BCL2L2</b>   | CKS1B       | FBXO11       | HIST1H2BC    | MAP2K1      | P2RY8      | SDHA        | TP63         |               |
| <b>BCL6</b>     | CPS1        | FBXO31       | HIST1H2BJ    | MAP2K2      | PAG1       | SDHB        | TRAF2        |               |
| <b>BCL7A</b>    | CREBBP      | FBXW7        | HIST1H2BK    | MAP2K4      | PAK3       | SDHC        | TRAF3        |               |
| <b>BCOR</b>     | CRKL        | FGF10        | HIST1H2BO    | MAP3K1      | PALB2      | SDHD        | TRAF5        |               |
| <b>BCORL1</b>   | CRLF2       | FGF14        | HIST1H3B     | MAP3K14     | PASK       | SERP2       | TSC1         |               |
| <b>BIRC3</b>    | CSF1R       | FGF19        | HNF1A        | MAP3K6      | PAX5       | SETBP1      | TSC2         |               |
| <b>BLM</b>      | CSF3R       | FGF23        | HRAS         | MAP3K7      | PBRM1 PC   | SETD2       | TSHR         |               |
| <b>BRAF</b>     | CTCF        | FGF3         | HSP90AA1     | MAPK1       | PCBP1      | SF3B1       | TUSC3        |               |
| <b>BRCA1</b>    | CTNNA1      | FGF4         | ICK          | MCL1        | PCLO       | SGK1        | TYK2         |               |
| <b>BRCA2</b>    | CTNNB1      | FGF6         | ID3          | MDM2        | PDCD1      | SMAD2       | U2AF1        |               |
| <b>BRD4</b>     | CUX1        | FGFR1        | IDH1         | MDM4        | PDCD11     | SMAD4       | U2AF2        |               |

|                 |        |         |             |       |          |         |        |
|-----------------|--------|---------|-------------|-------|----------|---------|--------|
| <b>BRIP1</b>    | CXCR4  | FGFR2   | IDH2        | MED12 | PDCD1LG2 | SMARCA1 | VHL    |
| <b>BRSK1</b>    | DAXX   | FGFR3   | IGF1R       | MEF2B | PDGFRA   | SMARCA4 | WDR90  |
| <b>BTG2</b>     | DDR2   | FGFR4   | IKBKE IKZF1 | MEF2C | PDGFRB   | SMARCB1 | WHSC1  |
| <b>BTK</b>      | DDX3X  | FHIT    | IKZF2       | MEN1  | PDK1     | SMC1A   | WISP3  |
| <b>BTLA</b>     | DNM2   | FLCN    | IKZF3       | MET   | PHF6     | SMC3    | WT1    |
| <b>C11orf30</b> | DNMT3A | FLT1    | IL7R        | MIB1  | PIK3CA   | SMO     | XBP1   |
| <b>CAD</b>      | DOT1L  | FLT3    | INHBA       | MITF  | PIK3CG   | SOCS1   | XPO1   |
| <b>CALR</b>     | DTX1   | FLT4    | INPP4B      | MKI67 | PIK3R1   | SOCS2   | YY1AP1 |
| <b>CARD11</b>   | DUSP2  | FLYWCH1 | INPP5D      | MLH1  | PIK3R2   | SOCS3   | ZMYM3  |

Selected DNA rearrangements

| <b>ALK</b>   | <b>ETV4</b> | <b>KMT2A(MLL)</b> | <b>TRG</b> |
|--------------|-------------|-------------------|------------|
| <b>BCL2</b>  | ETV5        | MYC               |            |
| <b>BCL6</b>  | ETV6        | NTRK1             |            |
| <b>BCR</b>   | EWSR1       | PDGFRA            |            |
| <b>BRAF</b>  | FGFR2       | PDGFRB            |            |
| <b>CCND1</b> | IGH         | RAF1              |            |
| <b>CRLF2</b> | IGK         | RARA              |            |
| <b>EGFR</b>  | IGL         | RET               |            |
| <b>EPOR</b>  | JAK1        | ROS1              |            |
| <b>ETV1</b>  | JAK2        | TMPRSS2           |            |

Selected RNA gene fusions

| <b>ABI1</b>  | <b>CREBBP</b> | <b>HMGA1</b> | <b>MUC1</b> | <b>PTCH1</b> | <b>TP63</b> |
|--------------|---------------|--------------|-------------|--------------|-------------|
| <b>ABL1</b>  | CRLF2         | HMGA2        | MYB         | PTK7         | TPM3        |
| <b>ABL2</b>  | CSF1          | HOXA11       | MYC         | RABEP1       | TPM4        |
| <b>ACSL6</b> | CTNNB1        | HOXA13       | MYH11       | RAF1         | TRIM24      |
| <b>AFF1</b>  | DDIT3         | HOXA3        | MYH9        | RALGDS       | TRIP11      |
| <b>AFF4</b>  | DDX10         | HOXA9        | NACA        | RAP1GDS1     | TTL         |



|                 |         |          |          |         |         |
|-----------------|---------|----------|----------|---------|---------|
| <b>ALK</b>      | DDX6    | HOXC11   | NBEAP1   | RARA    | TYK2    |
| <b>ARHGAP26</b> | DEK     | HOXC13   | NCOA2    | RBM15   | USP6    |
| <b>ARHGEF12</b> | DUSP22  | HOXD11   | NDRG1    | RET     | WHSC1   |
| <b>ARID1A</b>   | EGFR    | HOXD13   | NF1      | RHOH    | WHSC1L1 |
| <b>ARNT</b>     | EIF4A2  | HSP90AA1 | NF2      | RNF213  | YPEL5   |
| <b>ASXL1</b>    | ELF4    | HSP90AB1 | NFKB2    | ROS1    | ZBTB16  |
| <b>ATF1</b>     | ELL     | IGH      | NIN      | RPL22   | ZMYM2   |
| <b>ATG5</b>     | ELN     | IGK      | NOTCH1   | RPN1    | ZNF384  |
| <b>ATIC</b>     | EML4    | IGL      | NPM1     | RUNX1   | ZNF521  |
| <b>BCL10</b>    | EP300   | IKZF1    | NR4A3    | RUNX1T1 |         |
| <b>BCL11A</b>   | EPOR    | IL21R    | NSD1     | RUNX2   |         |
| <b>BCL11B</b>   | EPS15   | IL3      | NTRK1    | SEC31A  |         |
| <b>BCL2</b>     | ERBB2   | IRF4     | NTRK2    | SEPT5   |         |
| <b>BCL3</b>     | ERG     | ITK      | NTRK3    | SEPT6   |         |
| <b>BCL6</b>     | ETS1    | JAK1     | NUMA1    | SEPT9   |         |
| <b>BCL7A</b>    | ETV1    | JAK2     | NUP214   | SET     |         |
| <b>BCL9</b>     | ETV4    | JAK3     | NUP98    | SH3GL1  |         |
| <b>BCOR</b>     | ETV5    | JAZF1    | NUTM2A   | SLC1A2  |         |
| <b>BCR</b>      | ETV6    | KAT6A    | OMD      | SNX29   |         |
| <b>BIRC3</b>    | EWSR1   | KDSR     | P2RY8    | SRSF3   |         |
| <b>BRAF</b>     | FCGR2B  | KIF5B    | PAFAH1B2 | SS18    |         |
| <b>BTG1</b>     | FCRL4   | KMT2A    | PAX3     | SSX1    |         |
| <b>CAMTA1</b>   | FEV     | LASP1    | PAX5     | SSX2    |         |
| <b>CARS</b>     | FGFR1   | LCP1     | PAX7     | SSX4    |         |
| <b>CBFA2T3</b>  | FGFR10P | LMO1     | PBX1     | STAT6   |         |
| <b>CBFB</b>     | FGFR2   | LMO2     | PCM1     | STL     |         |
| <b>CBL</b>      | FGFR3   | LPP      | PCSK7    | SYK     |         |
| <b>CCND1</b>    | FLI1    | LYL1     | PDCD1LG2 | TAF15   |         |

|                |          |        |         |           |
|----------------|----------|--------|---------|-----------|
| <b>CCND2</b>   | FNBP1    | MAF    | PDE4DIP | TAL1      |
| <b>CCND3</b>   | FOXO1    | MAFB   | PDGFB   | TAL2      |
| <b>CD274</b>   | FOXO3    | MALT1  | PDGFRA  | TBL1XR1   |
| <b>CDK6</b>    | FOXO4    | MDS2   | PDGFRB  | TCF3      |
| <b>CDX2</b>    | FOXP1    | MECOM  | PER1    | TCL1A     |
| <b>CHIC2</b>   | FSTL3    | MKL1   | PHF1    | TEC       |
| <b>CHN1</b>    | FUS      | MLF1   | PICALM  | TET1      |
| <b>CIC</b>     | GAS7     | MLLT1  | PIM1    | TFE3      |
| <b>CIITA</b>   | GLI1     | MLLT10 | PLAG1   | TFG       |
| <b>CLP1</b>    | GMPS     | MLLT3  | PML     | TFPT      |
| <b>CLTC</b>    | GPHN     | MLLT4  | POU2AF1 | TFRC      |
| <b>CLTCL1</b>  | HERPUD1  | MLLT6  | PPP1CB  | TLX1      |
| <b>CNTRL</b>   | HEY1     | MN1    | PRDM1   | TLX3      |
| <b>COL1A1</b>  | HIP1     | MNX1   | PRDM16  | TMPRSS2   |
| <b>CREB3L1</b> | HIST1H4I | MSI2   | PRRX1   | TNFRSF11A |
| <b>CREB3L2</b> | HLF      | MSN    | PSIP1   | TOP1      |

**Table S6 Gene list of MSK IMPACT panel**

|           |        |        |        |           |         |        |         |         |          |       |
|-----------|--------|--------|--------|-----------|---------|--------|---------|---------|----------|-------|
| ABL1      | BCL11B | CEBPA  | ETNK1  | HDAC1     | JAK1    | MLH1   | PCBP1   | REL     | SMG1     | U2AF2 |
| ACTG1     | BCL2   | CHEK1  | ETV6   | HDAC4     | JAK2    | MOB3B  | PDCD1   | RET     | SMO      | UBR5  |
| AKT1      | BCL6   | CHEK2  | EZH2   | HDAC7     | JAK3    | MPEG1  | PDGFRA  | RHOA    | SOCS1    | VAV1  |
| AKT2      | BCOR   | CIC    | FAM46C | HGF       | JARID2  | MPL    | PDGFRB  | RICTOR  | SOX2     | VAV2  |
| AKT3      | BCORL1 | CIITA  | FANCA  | HIF1A     | JUN     | MRE11A | PDPK1   | RNF43   | SP140    | VHL   |
| ALK       | BCR    | CRBN   | FANCC  | HIST1H1B  | KDM5A   | MSH2   | PDS5B   | ROBO1   | SPEN     | WHSC1 |
| ALOX12B   | BIRC3  | CREBBP | FANCD2 | HIST1H1C  | KDM5C   | MSH6   | PHF6    | ROS1    | SPOP     | WT1   |
| AMER1     | BLM    | CRKL   | FAS    | HIST1H1D  | KDM6A   | MTOR   | PIGA    | RPTOR   | SRC      | XBP1  |
| APC       | BRAF   | CRLF2  | FAT1   | HIST1H1E  | KDR     | MUTYH  | PIK3C2G | RRAGC   | SRSF2    | XPO1  |
| AR        | BRCA1  | CSF1R  | FBXO11 | HIST1H2AC | KEAP1   | MYC    | PIK3C3  | RTEL1   | STAG1    | ZRSR2 |
| ARAF      | BRCA2  | CSF3R  | FBXW7  | HIST1H2AG | KIT     | MYCL1  | PIK3CA  | RUNX1   | STAG2    |       |
| ARHGGEF28 | BRD4   | CTCF   | FGF19  | HIST1H2AL | KMT2A   | MYCN   | PIK3CG  | RUNX1T1 | STAT3    |       |
| ARID1A    | BRIP1  | CTNNB1 | FGF3   | HIST1H2AM | KMT2B   | MYD88  | PIK3R1  | SAMHD1  | STAT5A   |       |
| ARID1B    | BTG1   | CUX1   | FGF4   | HIST1H2BC | KMT2C   | NBN    | PIK3R2  | SDHA    | STAT5B   |       |
| ARID2     | BTK    | CXCR4  | FGFR1  | HIST1H2BD | KMT2D   | NCOR1  | PIM1    | SDHB    | STAT6    |       |
| ARID3A    | CALR   | CYLD   | FGFR2  | HIST1H2BG | KRAS    | NCOR2  | PLCG1   | SDHC    | STK11    |       |
| ARID3B    | CARD11 | DAXX   | FGFR3  | HIST1H2BJ | KSR2    | NCSTN  | PLCG2   | SDHD    | SUFU     |       |
| ARID3C    | CASP8  | DDR2   | FGFR4  | HIST1H2BK | LCK     | NF1    | PMS2    | SETBP1  | SUZ12    |       |
| ARID4A    | CBFB   | DDX3X  | FLCN   | HIST1H2BO | LMO1    | NF2    | PNRC1   | SETD1A  | SYK      |       |
| ARID4B    | CBL    | DIS3   | FLT1   | HIST1H3B  | LTB     | NFE2   | POT1    | SETD1B  | TBL1XR1  |       |
| ARID5A    | CCND1  | DNMT3A | FLT3   | HIST1H3G  | MALT1   | NFE2L2 | PPP2R1A | SETD2   | TBX3     |       |
| ARID5B    | CCND2  | DOT1L  | FLT4   | HLA-A     | MAP2K1  | NKX2-1 | PRDM1   | SETD3   | TERT     |       |
| ASXL1     | CCND3  | DTX1   | FOXL2  | HNF1A     | MAP2K2  | NOTCH1 | PRKAR1A | SETD4   | TET1     |       |
| ASXL2     | CCNE1  | DUSP22 | FOXO1  | HRAS      | MAP2K4  | NOTCH2 | PTCH1   | SETD5   | TET2     |       |
| ATM       | CD274  | EED    | FOXP1  | ID3       | MAP3K1  | NOTCH3 | PTEN    | SETD6   | TET3     |       |
| ATP6AP1   | CD28   | EGFR   | FURIN  | IDH1      | MAP3K13 | NOTCH4 | PTPN1   | SETD7   | TGFBR2   |       |
| ATP6V1B2  | CD58   | EGR1   | FYN    | IDH2      | MAP3K14 | NPM1   | PTPN11  | SETD8   | TNFAIP3  |       |
| ATR       | CD79A  | EP300  | GATA1  | IGF1      | MAPK1   | NRAS   | PTPN2   | SETDB1  | TNFRSF14 |       |
| ATRX      | CD79B  | EP400  | GATA2  | IGF1R     | MAPK3   | NSD1   | RAD21   | SETDB2  | TOP1     |       |
| ATXN2     | CDC73  | EPHA3  | GATA3  | IGF2      | MCL1    | NT5C2  | RAD50   | SF3B1   | TP53     |       |
| AURKA     | CDH1   | EPHA5  | GNA11  | IKBKE     | MDM2    | NTRK1  | RAD51   | SGK1    | TP63     |       |
| AURKB     | CDK12  | EPHA7  | GNA12  | IKZF1     | MDM4    | NTRK2  | RAD51B  | SH2B3   | TRAF2    |       |
| AXIN1     | CDK4   | EPHB1  | GNA13  | IKZF3     | MED12   | NTRK3  | RAD51C  | SMAD2   | TRAF3    |       |
| AXL       | CDK6   | ERBB2  | GNAQ   | IL7R      | MEF2B   | P2RY8  | RAD51D  | SMAD4   | TRAF5    |       |
| B2M       | CDK8   | ERBB3  | GNAS   | INPP4B    | MEN1    | PAK7   | RAD52   | SMARCA4 | TSC1     |       |

---

|       |        |       |        |      |      |       |        |         |       |
|-------|--------|-------|--------|------|------|-------|--------|---------|-------|
| BACH2 | CDKN1B | ERBB4 | GNB1   | IRF1 | MET  | PALB2 | RAD54L | SMARCB1 | TSC2  |
| BAP1  | CDKN2A | ERG   | GRIN2A | IRF4 | MGA  | PARP1 | RAF1   | SMARCD1 | TSHR  |
| BARD1 | CDKN2B | ESCO2 | GSK3B  | IRF8 | MGAM | PAX5  | RARA   | SMC1A   | TYK2  |
| BCL10 | CDKN2C | ESR1  | GTF2I  | IRS2 | MITF | PBRM1 | RB1    | SMC3    | U2AF1 |

---

**Table S7 Gene list of Archer panel**

---

|       |        |        |        |         |
|-------|--------|--------|--------|---------|
| ABL1  | CCND3  | KAT6A  | NUP214 | RUNX1   |
| ABL2  | CDK6   | KMT2A  | P2RY8  | RUNX1T1 |
| ALK   | CHIC2  | MECOM  | PDGFRA | STIL    |
| BCL2  | CRLF2  | MKL1   | PDGFRB | TAL1    |
| BCL6  | DEK    | MLF1   | PICALM | TCF3    |
| BCR   | DUSP22 | MLLT10 | PML    | TP63    |
| BIRC3 | ETV6   | MYC    | PRDM16 |         |
| CBFB  | FGFR1  | MYH11  | RARA   |         |
| CCND1 | JAK2   | NOTCH1 | RBM15  |         |

---
